# Supplementary material for: Smartphone Control Mobile Robot for Education and Research
Source: Hindawi journal article supplement (doi:10.1155/2022/5178629), 2022-10-26
Supplement: f1 [file 5178629.f1.pdf]

# APPENDICES ON SOURCE CODES

## Appendix C

Source code for MJPG Streamer (Uctronics, 2018)

```
#include <stdio.h>
#include <stdlib.h>
#include <unistd.h>
#include <string.h>
#include <sys/ioctl.h>
#include <errno.h>
#include <signal.h>
#include <sys/socket.h>
#include <arpa/inet.h>
#include <sys/types.h>
#include <sys/stat.h>
#include <getopt.h>
#include <pthread.h>
#include <dlfcn.h>
#include <fcntl.h>
#include <syslog.h>
#include <linux/types.h>      /* for videodev2.h */
#include <linux/videodev2.h>

#include "utils.h"
#include "mjpg_streamer.h"

/* globals */
static globals global;

/*****
Description.: Display a help message
Input Value.: argv[0] is the program name and the parameter progname
Return Value: -
*****/
static void help(char *progname)
{
    fprintf(stderr, "-----\n");
    fprintf(stderr, "Usage: %s\n" \
        "  -i | --input \"<input-plugin.so> [parameters]\"\n" \
        "  -o | --output \"<output-plugin.so> [parameters]\"\n" \
        "  [-h | --help ].....: display this help\n" \
        "  [-v | --version ].....: display version information\n" \
        "  [-b | --background]...: fork to the background, daemon mode", progname);
    fprintf(stderr, "-----\n");
    fprintf(stderr, "Example #1:\n" \
        "  To open an UVC webcam \"/dev/video1\" and stream it via HTTP:\n" \
        "  %s -i \"input_uvc.so -d /dev/video1\" -o \"output_http.so\"", progname);
    fprintf(stderr, "-----\n");
    fprintf(stderr, "Example #2:\n" \
        "  To open an UVC webcam and stream via HTTP port 8090:\n" \
        "  %s -i \"input_uvc.so\" -o \"output_http.so -p 8090\"", progname);
    fprintf(stderr, "-----\n");
    fprintf(stderr, "Example #3:\n" \
        "  To get help for a certain input plugin:\n" \
        "  %s -i \"input_uvc.so --help\"", progname);
    fprintf(stderr, "-----\n");
    fprintf(stderr, "In case the modules (=plugins) can not be found:\n" \
        "  * Set the default search path for the modules with:\n" \

```

```

    " export LD_LIBRARY_PATH=/path/to/plugins,\n" \
    " * or put the plugins into the \"/lib/" or \"/usr/lib/" folder,\n" \
    " * or instead of just providing the plugin file name, use a complete\n" \
    " path and filename:\n" \
    " %s -i \"/path/to/modules/input_uvc.so"\n", progname);
    fprintf(stderr, "-----\n");
}

/*****
Description.: pressing CTRL+C sends signals to this process instead of just
killing it plugins can tidily shutdown and free allocated
resources. The function prototype is defined by the system,
because it is a callback function.
Input Value.: sig tells us which signal was received
Return Value: -
*****/
static void signal_handler(int sig)
{
    int i;

    /* signal "stop" to threads */
    LOG("setting signal to stop\n");
    global.stop = 1;
    usleep(1000 * 1000);

    /* clean up threads */
    LOG("force cancellation of threads and cleanup resources\n");
    for(i = 0; i < global.incnt; i++) {
        global.in[i].stop(i);
        /*for (j = 0; j<MAX_PLUGIN_ARGUMENTS; j++) {
            if (global.in[i].param.argv[j] != NULL) {
                free(global.in[i].param.argv[j]);
            }
        }*/
    }

    for(i = 0; i < global.outcnt; i++) {
        global.out[i].stop(global.out[i].param.id);
        pthread_cond_destroy(&global.in[i].db_update);
        pthread_mutex_destroy(&global.in[i].db);
        /*for (j = 0; j<MAX_PLUGIN_ARGUMENTS; j++) {
            if (global.out[i].param.argv[j] != NULL)
                free(global.out[i].param.argv[j]);
        }*/
    }
    usleep(1000 * 1000);

    /* close handles of input plugins */
    for(i = 0; i < global.incnt; i++) {
        dlclose(global.in[i].handle);
    }

    for(i = 0; i < global.outcnt; i++) {
        int j, skip = 0;
        DBG("about to decrement usage counter for handle of %s, id #%02d, handle: %p\n", \
            global.out[i].plugin, global.out[i].param.id, global.out[i].handle);

        for(j=i+1; j<global.outcnt; j++) {
            if ( global.out[i].handle == global.out[j].handle ) {

```

```

        DBG("handles are pointing to the same destination (%p == %p)\n", global.out[i].handle,
global.out[j].handle);
        skip = 1;
    }
}
if ( skip ) {
    continue;
}

    DBG("closing handle %p\n", global.out[i].handle);

    dlclose(global.out[i].handle);
}
DBG("all plugin handles closed\n");

LOG("done\n");

closelog();
exit(0);
return;
}

static int split_parameters(char *parameter_string, int *argc, char **argv)
{
    int count = 1;
    argv[0] = NULL; // the plugin may set it to 'INPUT_PLUGIN_NAME'
    if(parameter_string != NULL && strlen(parameter_string) != 0) {
        char *arg = NULL, *saveptr = NULL, *token = NULL;

        arg = strdup(parameter_string);

        if(strchr(arg, ' ') != NULL) {
            token = strtok_r(arg, " ", &saveptr);
            if(token != NULL) {
                argv[count] = strdup(token);
                count++;
                while((token = strtok_r(NULL, " ", &saveptr)) != NULL) {
                    argv[count] = strdup(token);
                    count++;
                    if(count >= MAX_PLUGIN_ARGUMENTS) {
                        IPRINT("ERROR: too many arguments to input plugin\n");
                        return 0;
                    }
                }
            }
        }
        free(arg);
    }
    *argc = count;
    return 1;
}

/*****
Description.:
Input Value.:
Return Value:
*****/
int main(int argc, char *argv[])
{
    //char *input = "input_uvc.so --resolution 640x480 --fps 5 --device /dev/video0";

```

```

char *input[MAX_INPUT_PLUGINS];
char *output[MAX_OUTPUT_PLUGINS];
int daemon = 0, i, j;
size_t tmp = 0;

output[0] = "output_http.so --port 8080";
global.outcnt = 0;
global.incnt = 0;

/* parameter parsing */
while(1) {
    int c = 0;
    static struct option long_options[] = {
        {"help", no_argument, NULL, 'h'},
        {"input", required_argument, NULL, 'i'},
        {"output", required_argument, NULL, 'o'},
        {"version", no_argument, NULL, 'v'},
        {"background", no_argument, NULL, 'b'},
        {NULL, 0, NULL, 0}
    };

    c = getopt_long(argc, argv, "hi:o:vb", long_options, NULL);

    /* no more options to parse */
    if(c == -1) break;

    switch(c) {
    case 'i':
        input[global.incnt++] = strdup(optarg);
        break;

    case 'o':
        output[global.outcnt++] = strdup(optarg);
        break;

    case 'v':
        printf("MJPEG Streamer Version: %s\n",
#ifdef GIT_HASH
            GIT_HASH
#else
            SOURCE_VERSION
#endif
        );
        return 0;
        break;

    case 'b':
        daemon = 1;
        break;

    case 'h': /* fall through */
    default:
        help(argv[0]);
        exit(EXIT_FAILURE);
    }
}

openlog("MJPEG-streamer ", LOG_PID | LOG_CONS, LOG_USER);
//openlog("MJPEG-streamer ", LOG_PID|LOG_CONS|LOG_PERROR, LOG_USER);
syslog(LOG_INFO, "starting application");

```

```

/* fork to the background */
if(daemon) {
    LOG("enabling daemon mode");
    daemon_mode();
}

/* ignore SIGPIPE (send by OS if transmitting to closed TCP sockets) */
signal(SIGPIPE, SIG_IGN);

/* register signal handler for <CTRL>+C in order to clean up */
if(signal(SIGINT, signal_handler) == SIG_ERR) {
    LOG("could not register signal handler\n");
    closelog();

exit(EXIT_FAILURE);
}

/*
 * messages like the following will only be visible on your terminal
 * if not running in daemon mode
 */
#ifdef GIT_HASH
    LOG("MJPEG Streamer Version: git rev: %s\n", GIT_HASH);
#else
    LOG("MJPEG Streamer Version.: %s\n", SOURCE_VERSION);
#endif

/* check if at least one output plugin was selected */
if(global.outcnt == 0) {
    /* no? Then use the default plugin instead */
    global.outcnt = 1;
}

/* open input plugin */
for(i = 0; i < global.incnt; i++) {
    /* this mutex and the conditional variable are used to synchronize access to the global picture
buffer */
    if(pthread_mutex_init(&global.in[i].db, NULL) != 0) {
        LOG("could not initialize mutex variable\n");
        closelog();
        exit(EXIT_FAILURE);
    }
    if(pthread_cond_init(&global.in[i].db_update, NULL) != 0) {
        LOG("could not initialize condition variable\n");
        closelog();
        exit(EXIT_FAILURE);
    }
}

tmp = (size_t)(strchr(input[i], ' ') - input[i]);
global.in[i].stop = 0;
global.in[i].context = NULL;
global.in[i].buf = NULL;
global.in[i].size = 0;
global.in[i].plugin = (tmp > 0) ? strdup(input[i], tmp) : strdup(input[i]);
global.in[i].handle = dlopen(global.in[i].plugin, RTLD_LAZY);
if(!global.in[i].handle) {
    LOG("ERROR: could not find input plugin\n");
    LOG("    Perhaps you want to adjust the search path with:\n");
    LOG("    # export LD_LIBRARY_PATH=/path/to/plugin/folder\n");
}

```

```

    LOG("    dlopen: %s\n", dlerror());
    closelog();
    exit(EXIT_FAILURE);
}
global.in[i].init = dlsym(global.in[i].handle, "input_init");
if(global.in[i].init == NULL) {
    LOG("%s\n", dlerror());
    exit(EXIT_FAILURE);
}
global.in[i].stop = dlsym(global.in[i].handle, "input_stop");
if(global.in[i].stop == NULL) {
    LOG("%s\n", dlerror());
    exit(EXIT_FAILURE);
}
global.in[i].run = dlsym(global.in[i].handle, "input_run");
if(global.in[i].run == NULL) {
    LOG("%s\n", dlerror());
    exit(EXIT_FAILURE);
}
/* try to find optional command */
global.in[i].cmd = dlsym(global.in[i].handle, "input_cmd");

global.in[i].param.parameters = strchr(input[i], ' ');

for (j = 0; j<MAX_PLUGIN_ARGUMENTS; j++) {
    global.in[i].param.argv[j] = NULL;
}

split_parameters(global.in[i].param.parameters, &global.in[i].param argc, global.in[i].param argv);
global.in[i].param.global = &global;
global.in[i].param.id = i;

if(global.in[i].init(&global.in[i].param, i)) {
    LOG("input_init() return value signals to exit\n");
    closelog();
    exit(0);
}
}

/* open output plugin */
for(i = 0; i < global.outcnt; i++) {
    tmp = (size_t)(strchr(output[i], ' ') - output[i]);
    global.out[i].plugin = (tmp > 0) ? strdup(output[i], tmp) : strdup(output[i]);
    global.out[i].handle = dlopen(global.out[i].plugin, RTLD_LAZY);
    if(!global.out[i].handle) {
        LOG("ERROR: could not find output plugin %s\n", global.out[i].plugin);
        LOG("    Perhaps you want to adjust the search path with:\n");
        LOG("    # export LD_LIBRARY_PATH=/path/to/plugin/folder\n");
        LOG("    dlopen: %s\n", dlerror());
        closelog();
        exit(EXIT_FAILURE);
    }
    global.out[i].init = dlsym(global.out[i].handle, "output_init");
    if(global.out[i].init == NULL) {
        LOG("%s\n", dlerror());
        exit(EXIT_FAILURE);
    }
    global.out[i].stop = dlsym(global.out[i].handle, "output_stop");
    if(global.out[i].stop == NULL) {
        LOG("%s\n", dlerror());
    }
}

```

```

    exit(EXIT_FAILURE);
}
global.out[i].run = dlsym(global.out[i].handle, "output_run");
if(global.out[i].run == NULL) {
    LOG("%s\n", dlerror());
    exit(EXIT_FAILURE);
}

/* try to find optional command */
global.out[i].cmd = dlsym(global.out[i].handle, "output_cmd");

global.out[i].param.parameters = strchr(output[i], ' ');

for (j = 0; j < MAX_PLUGIN_ARGUMENTS; j++) {
    global.out[i].param.argv[j] = NULL;
}
split_parameters(global.out[i].param.parameters, &global.out[i].param argc,
global.out[i].param.argv);

global.out[i].param.global = &global;
global.out[i].param.id = i;
if(global.out[i].init(&global.out[i].param, i)) {
    LOG("output_init() return value signals to exit\n");
    closelog();
    exit(EXIT_FAILURE);
}
}

/* start to read the input, push pictures into global buffer */
DBG("starting %d input plugin\n", global.incnt);
for(i = 0; i < global.incnt; i++) {
    syslog(LOG_INFO, "starting input plugin %s", global.in[i].plugin);
    if(global.in[i].run(i)) {
        LOG("can not run input plugin %d: %s\n", i, global.in[i].plugin);
        closelog();
        return 1;
    }
}

DBG("starting %d output plugin(s)\n", global.outcnt);
for(i = 0; i < global.outcnt; i++) {
    syslog(LOG_INFO, "starting output plugin: %s (ID: %02d)", global.out[i].plugin,
global.out[i].param.id);
    global.out[i].run(global.out[i].param.id);
}

/* wait for signals */
pause();

return 0;
}

```

## Appendix D

Source code for Motor Driver (Uctronics, 2018)

```
#include <stdio.h>
#include <wiringPi.h>
#include <softPwm.h>
#include <softServo.h>
#include <unistd.h>
#include "motordriver.h"

#define BIT(bit) (1 << (bit))

static uint8_t latch_state; // The state of the shift register on the physical board.

/*
Write to shift register.
*/
void latch_tx(void)
{
    unsigned char i;

    digitalWrite (MOTORLATCH, LOW);

    digitalWrite (MOTORDATA, LOW);

    for (i=0; i<8; i++)
    {
        delayMicroseconds(1); // 10 micros delayMicroseconds

        digitalWrite (MOTORCLK, LOW);

        if (latch_state & BIT(7-i))
        {
            digitalWrite (MOTORDATA, HIGH);
        }
        else
        {
            digitalWrite (MOTORDATA, LOW);
        }

        delayMicroseconds(1); // 10 micros delayMicroseconds
        digitalWrite (MOTORCLK, HIGH);
    }

    digitalWrite (MOTORLATCH, HIGH);
    return;
}

/*
* Initialize GPIOs and shift register.
*/
int ControllerInit(void)
{
    wiringPiSetup ();

    pinMode (MOTORLATCH, OUTPUT);
    pinMode(MOTORDATA, OUTPUT);
    pinMode(MOTORCLK, OUTPUT);
}
```



```

        latch_state = 0;
        latch_tx();
        return 0;
    }

    /*
    * Sets everything to LOW and calls gpioTerminate().
    */
    void ControllerShutdown(void)
    {
        DCMotorRun(1, RELEASE);
        DCMotorRun(2, RELEASE);
        DCMotorRun(3, RELEASE);
        DCMotorRun(4, RELEASE);

        // gpioTerminate();
        return;
    }

    /*
    * Reset a motor?
    */
    void DCMotorInit(uint8_t num)
    {
        switch (num)
        {
            case 1: latch_state &= ~BIT(MOTOR1_A) & ~BIT(MOTOR1_B);
            case 2: latch_state &= ~BIT(MOTOR2_A) & ~BIT(MOTOR2_B);
            case 3: latch_state &= ~BIT(MOTOR3_A) & ~BIT(MOTOR3_B);
            case 4: latch_state &= ~BIT(MOTOR4_A) & ~BIT(MOTOR4_B);
            default: return;
        }
    }

    latch_tx();

    // printf("Latch=%08X\n", latch_state);
    return;
}

/*
* Change latch_state and write it out to the shift register.
*/
void DCMotorRun(uint8_t motornum, uint8_t cmd)
{
    uint8_t a, b;

    switch (motornum)
    {
        case 1:
            a = MOTOR1_A;
            b = MOTOR1_B;
            break;

        case 2:
            a = MOTOR2_A;
            b = MOTOR2_B;
            break;

        case 3:
            a = MOTOR3_A;
            b = MOTOR3_B;

```

```

        break;
    case 4:
        a = MOTOR4_A;
        b = MOTOR4_B;
        break;
    default: return;
}

switch (cmd)
{
    case FORWARD:
        latch_state |= BIT(a);
        latch_state &= ~BIT(b);
        break;
    case BACKWARD:
        latch_state &= ~BIT(a);
        latch_state |= BIT(b);
        break;
    case RELEASE:
        latch_state &= ~BIT(a);
        latch_state &= ~BIT(b);
        break;
    default: return;
}

latch_tx();

// printf("Latch=%08X\n", latch_state);
return;
}

void go_forward(void) {
    DCMotorRun(1, FORWARD);
    DCMotorRun(2, FORWARD);
    DCMotorRun(3, FORWARD);
    DCMotorRun(4, FORWARD);
return;
}

void go_left(void) {
    DCMotorRun(2, FORWARD);
    DCMotorRun(1, BACKWARD);
    DCMotorRun(3, BACKWARD);
    DCMotorRun(4, FORWARD);
return;
}

void go_right(void) {
    DCMotorRun(2, BACKWARD);
    DCMotorRun(1, FORWARD);
    DCMotorRun(3, FORWARD);
    DCMotorRun(4, BACKWARD);
return;
}

void go_forward_left(void) {
    DCMotorRun(2, FORWARD);
    DCMotorRun(1, RELEASE);
    DCMotorRun(3, RELEASE);
}

```

```

        DCMotorRun(4, FORWARD);
return;
}

void go_forward_right(void) {
    DCMotorRun(2, RELEASE);
    DCMotorRun(1, FORWARD);
    DCMotorRun(3, FORWARD);
    DCMotorRun(4, RELEASE);
return;
}

void go_back(void) {
    DCMotorRun(1, BACKWARD);
    DCMotorRun(2, BACKWARD);
    DCMotorRun(3, BACKWARD);
    DCMotorRun(4, BACKWARD);
return;
}

void go_back_left(void) {
    DCMotorRun(2, BACKWARD);
    DCMotorRun(1, RELEASE);
    DCMotorRun(3, RELEASE);
    DCMotorRun(4, BACKWARD);
return;
}

void go_back_right(void) {
    DCMotorRun(2, RELEASE);
    DCMotorRun(1, BACKWARD);
    DCMotorRun(3, BACKWARD);
    DCMotorRun(4, RELEASE);
return;
}

void stop(void) {
    DCMotorRun(1, RELEASE);
    DCMotorRun(2, RELEASE);
    DCMotorRun(3, RELEASE);
    DCMotorRun(4, RELEASE);
return;
}
/*
 * A test.
 */
void TestRun(void)
{
    DCMotorRun(1, FORWARD);
    sleep(2);
    DCMotorRun(1, RELEASE);

    DCMotorRun(2, FORWARD);
    sleep(2);
    DCMotorRun(2, RELEASE);

    DCMotorRun(3, FORWARD);
    sleep(2);
    DCMotorRun(3, RELEASE);
}

```

```
    DCMotorRun(4, FORWARD);
    sleep(2);
    DCMotorRun(4, RELEASE);

    sleep(1);
return;
}

/*
* Main

int main (int argc, char *argv[])
{
    if (gpioInitialise() < 0) return 1;

    ControllerInit();

    TestRun();

    ControllerShutdown();

    return 0;
}
*/
```

## Appendix E

### Source Code for API for Ultrasonic Sensor and Camera (Uctronics, 2018)

```
const app = require('express');
const cors = require('cors');
const helmet = require('helmet');
const logger = require('morgan');
const server = require('http').Server(app);
const io = require('socket.io')(server);
const netSock = require('net').Socket;
const cSocket = new netSock();

// helmet middleware implementation
app.use(helmet());

// logger middleware implementation
app.use(logger('dev'));

// cors middleware implementation
app.use(cors());

// Car controller commands.
const car = {
  left: 0,
  front: 1,
  right: 2,
  back: 3,
  stopLeft: 4,
  stop: 5,
  stopRight: 6,
  startTracking: 11,
  stopTracking: 12,
  startAutoPilot: 17,
  stopAutoPilot: 18,
  powerOff: 19,
};

// Camera controller commands.
const cam = {
  left: 7,
  right: 8,
  up: 9,
  down: 10,
};

// App Closed.
cSocket.on('close', reason => {
  console.log('Socket Closed with Error?', reason);
});

// Server Error.
cSocket.on('error', error => {
  console.log('Socket Error:', error);
});

// Car Response.
cSocket.on('data', data => {
  const res = JSON.parse(data.toString() || '{}');
  console.log('Socket Received:', res);
});
```

```
// Connection to car socket.
cSocket.connect(2001, () => {
  console.log('Socket Connected Successfully');
});

// Entry point.
app.get('/', (req, res) => {
  console.log('Welcome...');
  res.json({
    active: true,
    status: 'OK',
  });
});

// Waiting for users connection.
io.on('connection', (socket) => {
  console.log('A User connected');

  // Client disconnected.
  socket.on('disconnect', () => {
    console.log('A User Disconnected');
  });

  // Front Event.
  socket.on('driveFront', args => {
    const dir = Buffer.from([car.front]);
    cSocket.write(dir, err => {
      console.log('Front');
    });
  });

  // Back Event.
  socket.on('driveBack', args => {
    const dir = Buffer.from([car.back]);
    cSocket.write(dir, err => {
      console.log('Back');
    });
  });

  // Right Event.
  socket.on('driveRight', args => {
    const dir = Buffer.from([car.right]);
    cSocket.write(dir, err => {
      console.log('Right');
    });
  });

  // Left Event.
  socket.on('driveLeft', args => {
    const dir = Buffer.from([car.left]);
    cSocket.write(dir, err => {
      console.log('Left');
    });
  });

  // Stop all directional Events.
  socket.on('driveStop', args => {
    const dir = Buffer.from([car.stop]);
    cSocket.write(dir, err => {
```

```
    console.log('Stop');
  });
});

// Stop Left Event.
socket.on('driveStopLeft', args => {
  const dir = Buffer.from([car.stopLeft]);
  cSocket.write(dir, err => {
    console.log('Stop Left');
  });
});

// Stop Right Event.
socket.on('driveStopRight', args => {
  const dir = Buffer.from([car.stopRight]);
  cSocket.write(dir, err => {
    console.log('Stop Right');
  });
});

// Start Line Tracking Event.
socket.on('driveStartTracking', args => {
  const dir = Buffer.from([car.startTracking]);
  cSocket.write(dir, err => {
    console.log('Tracking Started');
  });
});

// Stop Line Tracking Event.
socket.on('driveStopTracking', args => {
  const dir = Buffer.from([car.stopTracking, car.stop]);
  cSocket.write(dir, err => {
    console.log('Tracking Stopped');
  });
});

// Start Auto Piloting Event.
socket.on('driveStartAutoPilot', args => {
  const dir = Buffer.from([car.startAutoPilot]);
  cSocket.write(dir, err => {
    console.log('Auto Pilot Started');
  });
});

// Stop Auto Pilot Event.
socket.on('driveStopAutoPilot', args => {
  const dir = Buffer.from([car.stopAutoPilot, car.stop]);
  cSocket.write(dir, err => {
    console.log('Auto Pilot Stopped');
  });
});

// Cam Up Event.
socket.on('camUp', args => {
  const dir = Buffer.from([cam.up]);
  cSocket.write(dir, err => {
    console.log('Camera Up');
  });
});
```

```
// Cam Down Event.
socket.on('camDown', args => {
  const dir = Buffer.from([cam.down]);
  cSocket.write(dir, err => {
    console.log('Camera Down');
  });
});

// Cam Left Event.

socket.on('camLeft', args => {
  const dir = Buffer.from([cam.left]);
  cSocket.write(dir, err => {
    console.log('Camera Left');
  });
});

// Cam Right Event.
socket.on('camRight', args => {
  const dir = Buffer.from([cam.right]);
  cSocket.write(dir, err => {
    console.log('Camera Right');
  });
});

// Power Off Event.
socket.on('powerOff', args => {
  const dir = Buffer.from([car.powerOff]);
  cSocket.write(dir, err => {
    console.log('Power Off');
  });
});

});

// server listener.
server.listen(3000, () => {
  console.log('Server Listening On: 3000');
```



## Appendix F

Source code for Remote server (Uctronics, 2018)

```
#include <stdio.h>

#include <stdlib.h>
#include <errno.h>
#include <string.h>
#include <wiringPi.h>
#include <softPwm.h>
#include <netdb.h>
#include <netinet/in.h>
#include <strings.h>
#include <unistd.h>
#include <fcntl.h>
#include <sys/mman.h>
#include "motordriver.h"
#include "remoteserver.h"
#include <pthread.h>
#include <sys/time.h>

#include <signal.h>
#include <stdarg.h>
#include <getopt.h>

#include "clk.h"
#include "gpio.h"
#include "dma.h"
#include "pwm.h"

#include "ws2811.h"

int baseSpeed, addLeftSpeed, addRightSpeed;
unsigned long getColour = 0xFF0000;
unsigned int getBrightness = 100;
static int speedVal_1 = 5000;
static int speedVal_2 = 5000;
static int speedVal_3 = 5000;
static int speedVal_4 = 5000;

struct motionstate carstate = {0, 0, 0, 0, 0, 0, 0, 0, 0, 0, 0, 0, 0, 0};
static unsigned char disWarning = 0;
static unsigned char poweroffFlag = 0;
static unsigned char turnLeftFlag = 0;
static unsigned char turnBackFlag = 0;
static unsigned char servoBeep = 0;
unsigned char buff[IR_LIMITS]; // bytes buffer
unsigned int bits; // 32768 bits capable
unsigned char done;
int sockfd, newsockfd, portno, clien;
unsigned char client_Connected = 0;
unsigned char count;

#define BLOCK_SIZE (4*1024)

#define ARRAY_SIZE(stuff) (sizeof(stuff) / sizeof(stuff[0]))
```

```

// defaults for cmdline options
#define TARGET_FREQ      WS2811_TARGET_FREQ
#define GPIO_PIN        18
#define DMA              10
#define STRIP_TYPE      WS2811_STRIP_RGB // WS2812/SK6812RGB integrated chip+leds
// #define STRIP_TYPE    WS2811_STRIP_GBR // WS2812/SK6812RGB integrated chip+leds
// #define STRIP_TYPE    SK6812_STRIP_RGBW // SK6812RGBW (NOT SK6812RGB)
#define WIDTH           4
#define HEIGHT          4
#define LED_COUNT       (WIDTH * HEIGHT)

void INThandler(int sig);
void exit_IKPEZE_Robot(void);
int mem_fd;
void *gpio_map;
// I/O access
volatile unsigned *gpio;
int width = WIDTH;
int height = HEIGHT;
int led_count = LED_COUNT;
int clear_on_exit = 0;
ws2811_t ledstring =
{
    .freq = TARGET_FREQ,
    .dmanum = DMA,
    .channel =
    {
        [0] =
        {
            .gpionum = GPIO_PIN,
            .count = LED_COUNT,
            .invert = 0,
            .brightness = 255,
            .strip_type = STRIP_TYPE,
        },
        [1] =
        {
            .gpionum = 0,
            .count = 0,
            .invert = 0,
            .brightness = 0,
        },
    },
};

ws2811_led_t *matrix;

unsigned long grb_colour_table[] =
{
    0xFF0000, // green
    0x00FF00, // red
    0x0000FF, // blue
    0xFFFF00, //yellow
    0xFF00FF,
    0x00FFFF, //pink
    0xFFFFFFFF, // white
    //0x000000,
};
unsigned long receive_colour_table[4] =
{

```

```

0xFF0000, // green
0x00FF00, // red
0x0000FF, // blue
0xFFFF00, //yellow
};

int PhaseScratchCmd(char command);

/* Creates a server socket and listens for a command from the remote.
*/
int main(int argc, char *argv[])
{
    usleep(10);
    char buffer[BUFFER_SIZE];
    struct sockaddr_in serv_addr, cli_addr;
    struct sigaction sa;
    int n, pulsenum, count ;
    static unsigned long previous_time = 0;
    static unsigned long now_time = 0;
    static unsigned long time_stamp = 0;
    static int getCollIndex = 0;
    static unsigned char readNowTime = 1;
    signal(SIGINT, INThandler);
    /* Initialise GPIO */
    if (ControllerInit() < 0) return -1;
    setup_io();
    ultraInit();
    servoInit();
    trackModeInit();
    beepInit();
    irInit();
    myPWMInit();
    GRBInit();
    pthread_t t1, t2;
    //creat two thread
    pthread_create(&t1, NULL, fun1, NULL);
    pthread_create(&t2, NULL, fun2, NULL);
    for (pulsenum = 0; pulsenum < 10; pulsenum++) {
        servoCtrl(servo_1, 1140);
        servoCtrl(servo_2, 630);
    }
    sockfd = socket(AF_INET, SOCK_STREAM, 0);
    if (sockfd < 0) {
        perror("ERROR opening socket");
        exit(1);
    }
    /* Initialize socket structure */
    bzero((char *) &serv_addr, sizeof(serv_addr));
    portno = 2001;
    serv_addr.sin_family = AF_INET;
    serv_addr.sin_addr.s_addr = INADDR_ANY;
    serv_addr.sin_port = htons(portno);

    /* Now bind the host address using bind() call.*/
    if (bind(sockfd, (struct sockaddr *) &serv_addr, sizeof(serv_addr)) < 0) {

```

```

perror("ERROR on binding");
exit(1);
}
/* Add support reconnection */
sa.sa_handler = SIG_IGN;
sigaction( SIGPIPE, &sa, 0 );
/* Now start listening for the clients, here process will
go in sleep mode and will wait for the incoming connection
*/
while (1) {
listen(sockfd, 5);
clilen = sizeof(cli_addr);
printf("Waiting connection...\r\n");
client_Connected = 0;
clearFlag();
stop();
BEEP_OPEN();
/* Accept actual connection from the client */
newsockfd = accept(sockfd, (struct sockaddr *)&cli_addr, (void *) &clilen);
if (newsockfd < 0) {
perror("ERROR on accept");
//exit(1);
}
/* If connection is established then start communicating */
printf("connect successfully\r\n");

sleep(0.5);
GRB_work(3, getColour, getBrightness);
n = write(newsockfd, "{\"version\":2}", 13);
client_Connected = 1;
sleep(0.001);
bzero(&buffer, BUFFER_SIZE);
while ((n = read(newsockfd, &buffer, BUFFER_SIZE)) > 0)
{
if (buffer[0] == 's') { //0x73
baseSpeed = buffer[1];
addLeftSpeed = buffer[2];
addRightSpeed = buffer[3];
speedVal_1 = 10000 * ((buffer[1] + buffer[2]) / 255.0);
speedVal_3 = 10000 * ((buffer[1] + buffer[2]) / 255.0);

speedVal_2 = 10000 * ((buffer[1] + buffer[3]) / 255.0);
speedVal_4 = 10000 * ((buffer[1] + buffer[3]) / 255.0);

} else if (buffer[0] == 'c') { //0x63
getColour = (buffer[1] << 16) | (buffer[2] << 8) | buffer[3];
getBrightness = buffer[4];
GRB_work(3, getColour, getBrightness);
if(readNowTime){
readNowTime = 0;
previous_time = get_pwm_timestamp();
}
now_time = get_pwm_timestamp();
time_stamp = now_time - previous_time;
if (time_stamp < 2000000) {
printf("set current direction\r\n");
receive_colour_table[getColIndex] = getColour;
} else {
readNowTime = 1;
printf("set next direction\r\n");
}
}
}

```

```

        getColIndex = (1+getColIndex)%4;
        receive_colour_table[getColIndex] = getColour;
        previous_time = get_pwm_timestamp();
    }

} else if (buffer[0] == 'v') {
    printf("Reveive value %d\n", buffer[0]);
    write(newsockfd, "{\"version\":2}", 13);
}
else {
    for(count = 0; count <n; count++){
        printf("receive data %d\r\n",buffer[count]);
    }
    if(buffer[0]==0xFF && buffer[1] == 0x55){
        for (count = 2; count < n; count ++ ) {
            PhaseScratchCmd(buffer[count]);
        }
    }else{
        for (count = 0; count < n; count ++ ) {
            updateCarState(buffer[count]);
            updateCarMotion();
        }
    }
}
bzero(&buffer, BUFFER_SIZE);
}
stop();
clearFlag();
if (n < 0) {
    printf("Connection exception!\n");
    //break;
}
}
client_Connected = 0;
close(sockfd);
printf("ERROR\r\n");
return 0;
}

void *fun1(void *arg) {
    unsigned char cnt = 0;
    float dis = 0, temp_min = 0, temp_max = 0, temp_value = 0, temp = 0;
    while (1) {
        usleep(1);
        temp_min = temp_max;
        temp_value = temp_max;
        for (cnt = 0; cnt < 3; cnt ++ ) {
            temp = disMeasure(); usleep(1);
            if (temp_max < temp) temp_max = temp;
            if (temp_min > temp) temp_min = temp;
            temp_value += temp;
        }
        dis = (temp_value - temp_max - temp_min);
        temp_value = 0; temp_min = 0; temp_max = 0; temp_value = 0; temp = 0;
        if (dis > 0 && dis <= 50) {
            disWarning = 1;
            if (carstate.forward) {
                if (!(carstate.autoAvoid)) {
                    stop();
                }
            }
        }
    }
}

```

```

    }
    } else disWarning = 0;

    if (!poweroffFlag) {
        beepWarning();
    }
        if(servoBeep){
            servoBeep = 0;
            digitalWrite(BEEP, HIGH);
            delay(100);
            digitalWrite(BEEP, LOW);
        }

    }
}

void *fun2(void *arg) {
    int IRVal = 0;
    while (1) {
        usleep(1);
        if (carstate.trackenable) {
            printf("Come in track mode \n");
            trackModeWork();
        }
        if (carstate.autoAvoid) {
            avoidance();
        }
        if (done == 1) {
            done = 0;
            IRVal = buf[2]; IRVal = IRVal << 8;
            IRVal = IRVal | buf[3];
            IR_updateCarState(IRVal);
            IR_updateCarMotion();
            IRVal = 0;
        }
        mySoftPwmWrite1(speedVal_1);
        mySoftPwmWrite2(speedVal_2);
        mySoftPwmWrite3(speedVal_3);
        mySoftPwmWrite4(speedVal_4);
        if (!poweroffFlag) getLedSta();
    }
}

int updateCarMotion(void) {
    static int angleA = 1140;
    static int angleB = 1140;
    char direction[16];
    if (carstate.forward && !carstate.back) {
        if (!(carstate.left && !carstate.right) ||
            (carstate.left && carstate.right)) {
            strcpy(direction, "forward");
            go_forward();
        } else if (carstate.left && !carstate.right) {
            strcpy(direction, "forward left");
            go_forward_left();
        } else if (carstate.right && !carstate.left) {
            strcpy(direction, "forward right");

```

```

    go_forward_right();
} else {
    strcpy(direction, "stop");
    stop();
}
}
else if (carstate.back && !carstate.forward) {
    if (!(carstate.left && !carstate.right) ||
        (carstate.left && carstate.right)) {
        strcpy(direction, "back");
        go_back();

    } else if (carstate.left && !carstate.right) {
        strcpy(direction, "back left");
        go_back_left();
    } else if (carstate.right && !carstate.left) {
        strcpy(direction, "back right");
        go_back_right();
    } else {
        strcpy(direction, "stop");
        stop();
    }
} else if (carstate.left && !carstate.right) {
    strcpy(direction, "left");
    go_left();
} else if (carstate.right && !carstate.left) {
    strcpy(direction, "right");
    go_right();
} else if( carstate. stop){
    carstate. stop = 0;
    stop();
}
if (carstate.servoLeft) {
    carstate.servoLeft = 0;
    strcpy(direction, "servo_left");
    if (angleA < 2000)
        angleA = angleA + 50;
    else{
        angleA = 2000;servoBeep =1;
        //BEEP_OPEN();
    }
    servoCtrl(servo_1, angleA);
    printf("angleA = %d\r\n", angleA);
}
if (carstate.servoRight) {
    carstate.servoRight = 0;
    strcpy(direction, "servo_right");
    if (angleA > 600)
        angleA = angleA - 50;
    else{
        angleA = 600;servoBeep =1;
    }
    servoCtrl(servo_1, angleA);
    printf("angleA = %d\r\n", angleA);
}
if (carstate.servoUp) {
    carstate.servoUp = 0;
    strcpy(direction, "servo_UP");
    if (angleB > 600)
        angleB = angleB - 50;
}

```

```

else{
    angleB = 600;servoBeep =1;
}
servoCtrl(servo_2, angleB);

printf("angleB = %d\r\n", angleB);
} else if (carstate.servoDown) {
    carstate.servoDown = 0;
    strcpy(direction, "servo_down");
    if (angleB < 2000)
        angleB = angleB + 50;
    else{
        angleB = 2000;servoBeep =1;
    }
    servoCtrl(servo_2, angleB);
    printf("angleB = %d\r\n", angleB);
}
printf("Motion: %s \n", direction);
return 0;
}
void clearFlag(void) {
    carstate.left = 0;
    carstate.forward = 0;
    carstate.right = 0;
    carstate.stop = 0;
    carstate.back = 0;
    carstate.servoLeft = 0;
    carstate.servoRight = 0;
    carstate.servoUp = 0;
    carstate.servoDown = 0;
    carstate.speedUp = 0;
    carstate.speedDown = 0;
    carstate.autoAvoid = 0;
}

int IR_updateCarMotion(void) {
    static int angleA = 1140;
    static int angleB = 630;
    char direction[16];
    if (carstate.forward) {
        strcpy(direction, "forward");
        go_forward(); printf("Motion: %s \n", direction);
    }
    if (carstate.back) {

        strcpy(direction, "back");
        go_back(); printf("Motion: %s \n", direction);
    }
    if (carstate.left) {
        strcpy(direction, "left");
        go_left(); printf("Motion: %s \n", direction);
    }

    if (carstate.right) {
        strcpy(direction, "right");
        go_right(); printf("Motion: %s \n", direction);
    }
    if (carstate.servoLeft) {

```



```

carstate.servoLeft = 0;
strcpy(direction, "servo_left");
if (angleA < 2300)
    angleA = angleA + 50;
else
    angleA = 2300;
servoCtrl(servo_1, angleA);
printf("angleA = %d\r\n", angleA);
}
if (carstate.servoRight) {
    carstate.servoRight = 0;
    strcpy(direction, "servo_right");
    if (angleA > 300)
        angleA = angleA - 50;
    else
        angleA = 300;
    servoCtrl(servo_1, angleA);
    printf("angleA = %d\r\n", angleA);
}
if (carstate.servoUp) {
    carstate.servoUp = 0;
    strcpy(direction, "servo_UP");
    if (angleB > 300)
        angleB = angleB - 50;
    else
        angleB = 300;
    servoCtrl(servo_2, angleB);
    printf("angleB = %d\r\n", angleB);
}
if (carstate.servoDown) {
    carstate.servoDown = 0;
    strcpy(direction, "servo_down");
    if (angleB < 1160)
        angleB = angleB + 50;
    else
        angleB = 1160;
    servoCtrl(servo_2, angleB);

    printf("angleB = %d\r\n", angleB);
}
return 0;
}

int IR_updateCarState(int command) {

if ( command == IR_up || command == IR_up_v2) {
    if (!disWarning)
        carstate.forward = 1;
    else
        carstate.forward = 0;
}
if ( command == IR_down || command == IR_down_v2) {
    carstate.back = 1;
}
if ( command == IR_Left || command == IR_Left_v2) {
    carstate.left = 1;
}
if ( command == IR_right || command == IR_right_v2) {
    carstate.right = 1;
}
}

```

```

if ( command == IR_stop || command == IR_stop_v2) {
    carstate.forward = 0;
    carstate.back = 0;
    carstate.right = 0;
    carstate.left = 0;
    stop(); printf("Motion: stop \n" );
}
if ( command == IR_speed_up) {
    carstate.speedUp = 1;
}
if ( command == IR_speed_down) {
    carstate.speedDown = 1;
}
if ( command == IR_servo_up) {
    carstate.servoUp = 1;
}
if ( command == IR_servo_down) {
    carstate.servoDown = 1;
}
if ( command == IR_servo_left) {
    carstate.servoLeft = 1;
}
if ( command == IR_servo_right) {
    carstate.servoRight = 1;
}
if ( command == IR_track) {
    carstate.trackenable = 1;
}
if ( command == IR_track_stop) {
    carstate.trackenable = 0;
    stop();
    printf("Motion: stop \n" );
}
return 0;
}

int PhaseScratchCmd(char command){
    static int angleA = 1140;
    static int angleB = 630;

    switch (command) {
    case 1: // go forward
        go_forward();
        GRB_work(3, receive_colour_table[2], getBrightness);
        break;
    case 2: //go backward
        if (!disWarning) {
            go_back();
            GRB_work(3, receive_colour_table[0], getBrightness);
        }
        else
            stop();
            carstate.trackenable = 0;
            carstate.autoAvoid = 0;
        break;
    case 3: //go left
        go_left();
        GRB_work(3, receive_colour_table[3], getBrightness);
        carstate.trackenable = 0;

```

```

    carstate.autoAvoid = 0;
    break;
case 4: //go right
    go_right();
    GRB_work(3, receive_colour_table[1], getBrightness);
    carstate.trackenable = 0;
    carstate.autoAvoid = 0;
    break;
case 5: //stop
    stop();
    carstate.trackenable = 0;
    carstate.autoAvoid = 0;
    break;
case 7: /* servo left */
    if (angleA < 2300)
        angleA = angleA + 50;
    else
        angleA = 2300;
    servoCtrl(servo_1, angleA);
    break;
case 8: /*servo right */
    if (angleA > 300)
        angleA = angleA - 50;
    else
        angleA = 300;
    servoCtrl(servo_1, angleA);
    break;
case 9: /* servo up */
    if (angleB > 300)
        angleB = angleB - 50;
    else
        angleB = 300;
    servoCtrl(servo_2, angleB);
    break;
case 10: /* servo down */
    if (angleB < 1160)
        angleB = angleB + 50;
    else
        angleB = 1160;
    servoCtrl(servo_2, angleB);
    break;
case 11: /* enable track */
    carstate.trackenable = 1;
    break;
case 12: /* disable track */
    carstate.trackenable = 0;
    break;
case 13:
    carstate.speedUp = 1;
    break;
case 14:
    carstate.speedDown = 1;
    break;
case 15: /* disable track */
    digitalWrite(BEEP, HIGH);
    break;
case 16: /* disable track */
    digitalWrite(BEEP, LOW);
    break;
case 17: /*automatic avoidance*/

```

```

    carstate.autoAvoid = 1;
    break;
case 18: /*stop automatic avoidance*/
    carstate.autoAvoid = 0;
    break;
case 19: /*turn off the robot car*/
    poweroffFlag = 1;
    exit_IKPEZE_Robot();
    printf("power off\n");
    system("sudo poweroff");
    break;
}
return 0;
}

/* Updates the struct MotionState of the car.
*/
int updateCarState(char command) {
switch (command) {
case 0: /* left */
    carstate.left = 1;
    GRB_work(3, receive_colour_table[2], getBrightness);
    break;
case 1: /* up */
    if (!disWarning) {
        carstate.forward = 1;
        GRB_work(3, receive_colour_table[0], getBrightness);
    }
    else
        carstate.forward = 0;
        carstate.trackenable = 0;
        carstate.autoAvoid = 0;

    break;
case 2: /* right */
    carstate.right = 1;
    GRB_work(3, receive_colour_table[3], getBrightness);
    carstate.trackenable = 0;
    carstate.autoAvoid = 0;
    break;
case 3: /* down */
    carstate.back = 1;
    GRB_work(3, receive_colour_table[1], getBrightness);
    carstate.trackenable = 0;
    carstate.autoAvoid = 0;
    break;
case 4: /* stop left */
    carstate.left = 0;
    carstate.trackenable = 0;
    carstate.autoAvoid = 0;
    break;
case 5: /* stop */
    carstate.forward = 0;
    carstate.back = 0;
        carstate.left = 0;
        carstate.right = 0;
    carstate.trackenable = 0;
    carstate.autoAvoid = 0;
        carstate.stop = 1;

    break;
case 6: /* stop right */

```

```

    carstate.right = 0;
    carstate.trackenable = 0;
    carstate.autoAvoid = 0;
    break;
case 7: /* servo left */
    carstate.servoLeft = 1;
    break;
case 8: /*servo right */
    carstate.servoRight = 1;
    break;
case 9: /* servo up */
    carstate.servoUp = 1;
    break;
case 10: /* servo down */
    carstate.servoDown = 1;
    break;
case 11: /* enable track */
    carstate.trackenable = 1;
    break;
case 12: /* disable track */
    carstate.trackenable = 0;
    break;
case 13: /* enable track */
    carstate.speedUp = 1;
    break;
case 14: /* disable track */
    carstate.speedDown = 1;
    break;
case 15: /* disable track */
    // carstate.beepenable = 1;
    digitalWrite(BEEP, HIGH);
    break;
case 16: /* disable track */
    // carstate.beepenable = 0;
    digitalWrite(BEEP, LOW);
    break;
case 17: /*automatic avoidance*/
    carstate.autoAvoid = 1;
    break;
case 18: /*stop automatic avoidance*/
    carstate.autoAvoid = 0;
    break;
case 19: /*turn off the robot car*/
    poweroffFlag = 1;
    exit_IKPEZE_Robot();
    printf("power off\n");
    system("sudo poweroff");

    break;
}
return 0;
}
void ultraInit(void)
{
    pinMode(Echo, INPUT);
    pinMode(Trig, OUTPUT);
}

float disMeasure(void)
{

```

```

struct timeval tv1;
struct timeval tv2;
long start, stop;
float dis;
long waitCount = 0;

digitalWrite(Trig, LOW);
delayMicroseconds(2);

digitalWrite(Trig, HIGH);
delayMicroseconds(10);
digitalWrite(Trig, LOW);
waitCount = 0;
while (!(digitalRead(Echo) == 1)) {
    if (++waitCount >= 5000)
        break;
    else sleep(0.001);
}
gettimeofday(&tv1, NULL);
waitCount = 0;
while (!(digitalRead(Echo) == 0)) {
    if (++waitCount >= 5000)
        break;
    else sleep(0.001);
}
gettimeofday(&tv2, NULL);
/*
int gettimeofday(struct timeval *tv, struct timezone *tz);
The functions gettimeofday() and settimeofday() can get and set the time as well as a timezone.
The use of the timezone structure is obsolete; the tz argument should normally be specified as
NULL.
*/
start = tv1.tv_sec * 1000000 + tv1.tv_usec;
stop = tv2.tv_sec * 1000000 + tv2.tv_usec;

dis = (float)(stop - start) / 1000000 * 34000 / 2;

return dis;
}

void trackModeInit() {
    INP_GPIO(leftSensor);
    GPIO_PULL = 1 << leftSensor;
    INP_GPIO(middleSensor);
    GPIO_PULL = 1 << middleSensor;
    INP_GPIO(rightSensor);
    GPIO_PULL = 1 << rightSensor;
}

void beepInit() {
    pinMode(BEEP, OUTPUT);
    digitalWrite(BEEP, LOW);
}

void getLedSta() {

    static unsigned long previous_time = 0;
    static unsigned long now_time = 0;
    static unsigned long time_stamp = 0;
    static unsigned char flag = 0;

```

```

static unsigned char colour_index = 0;
if (!disWarning) {

    if (!client_Connected) {
        if (!flag) {
            flag = 1;
            previous_time = get_pwm_timestamp();
        }
        now_time = get_pwm_timestamp();
        time_stamp = now_time - previous_time;
        if (time_stamp > 500000) {
            time_stamp = 0;
            flag = 0;
            colour_index = (1 + colour_index) % 7;
            //GRB_work(3, grb_colour_table[colour_index], 50);
            GRB_MultiColour_work(3, 100 );
        }
    }
}

void beepWarning() {
    static unsigned long previous_time = 0;
    static unsigned long now_time = 0;
    static unsigned long time_stamp = 0;
    static unsigned char flag = 0;
    static unsigned char canStopBeep = 0;
    if (disWarning) {
        canStopBeep = 1;
        if (!flag) {
            flag = 1;
            previous_time = get_pwm_timestamp();
        }
        now_time = get_pwm_timestamp();
        time_stamp = now_time - previous_time;
        if (time_stamp > 0 && time_stamp <= 50000 ) { //1/2T
            digitalWrite(BEEP, HIGH);
            GRB_work(3, 0, 0);
        }
        if (time_stamp > 50000 && time_stamp <= 2 * 50000 ) { //1T
            digitalWrite(BEEP, LOW);
            GRB_work(3, getColour, getBrightness);
        }
        if (time_stamp > 2 * 50000) {
            flag = 0;
        }
    } else if (canStopBeep) {
        canStopBeep = 0;
        digitalWrite(BEEP, LOW);
        GRB_work(3, getColour, getBrightness);
    }
}

void trackModeWork() {
    int num1 = 0, num2 = 0, num3 = 0;
    while (1) {
        if (!(carstate.trackenable))break;

        mySoftPwmWrite1(speedVal_1);
        mySoftPwmWrite2(speedVal_2);
        mySoftPwmWrite3(speedVal_3);
    }
}

```

```

mySoftPwmWrite4(speedVal_4);

num1 = GET_GPIO(leftSensor);
num2 = GET_GPIO(middleSensor);
num3 = GET_GPIO(rightSensor);
if ((num2 == 0) && (num1 == 0) && (num3 == 0)) {
    stop(); continue;
} else if ( (num1 == 0) && num3) { //go to right
    GRB_work(3, grb_colour_table[0], 100 );

    go_forward_left();
    while (1) {
        GRB_work(3, grb_colour_table[0], 100 );
        num2 = GET_GPIO(middleSensor);
        mySoftPwmWrite1(speedVal_1);
        mySoftPwmWrite2(speedVal_2);
        mySoftPwmWrite3(speedVal_3);
        mySoftPwmWrite4(speedVal_4);
        if (num2) {
            if (!(carstate.trackenable))break;
            if (disWarning) {
                stop();
            }
            else {
                GRB_work(3, grb_colour_table[1], 100 );
                go_forward_left();
            }
            continue;
        } else
            break;
    }
} else if ((num3 == 0) && num1) { // go to left
    go_forward_right();
    while (1) {
        num2 = GET_GPIO(middleSensor);
        mySoftPwmWrite1(speedVal_1);
        mySoftPwmWrite2(speedVal_2);
        mySoftPwmWrite3(speedVal_3);
        mySoftPwmWrite4(speedVal_4);
        if (num2) {
            if (!(carstate.trackenable))break;
            if (disWarning) {
                stop();
            }
            else {
                GRB_work(3, grb_colour_table[2], 100 );
                go_forward_right();
            }
            continue;
        } else
            break;
    }
} else if (disWarning) {
    stop();
}
else {
    go_forward();
}
}

```



```

}

unsigned char countLow(void)
{
    unsigned char i = 0;
    while ( digitalRead(IRIN) == 0 ); // wait
    while ( digitalRead(IRIN) == 1 ) {
        ++i;
        delayMicroseconds(26);
        if (i == 0) return 0; // timeout
    }
    return i;
}

void getIR() {
    unsigned char i;
    unsigned short j; // capable 32768 bits = 4096 bytes
    unsigned char k;
    bits = 0;
    i = countLow();
    for (j = 0; j < IR_LIMITS; j++) { // buffer bytes LIMITS
        for (i = 0; i < 8; i++) { // 8 bits
            k = countLow();
            if (k == 0) {
                buf[j] >>= (8 - i);
                done = 1; printf(" \n");
                return;
            }
            buf[j] >>= 1;
            buf[j] += ((k > 30) ? 0x80 : 0);
            ++bits;
        }
    }
    done = 1;
}

void turn() {
    static unsigned long previous_time = 0;
    static unsigned long now_time = 0;
    static unsigned long time_stamp = 0;
    static unsigned char flag = 0;
    if (!flag) {
        flag = 1;
        previous_time = get_pwm_timestamp();
    }
    now_time = get_pwm_timestamp();
    time_stamp = now_time - previous_time;
    if (time_stamp > 0 && time_stamp <= turnTime) { //1/2T
        go_back();turnBackFlag = 1;
    }
    if (time_stamp > turnTime && time_stamp <= 2 * turnTime) { //1T
        go_left();turnLeftFlag = 1;
    }
    if (time_stamp > 2 * turnTime) {
        stop(); flag = 0;turnLeftFlag = 0;turnBackFlag = 0;
    }
}

void avoidance(void)
{

```

```

while (1) {
    if (!(carstate.autoAvoid)) {
        stop();
        break;
    }
    mySoftPwmWrite1(speedVal_1);
    mySoftPwmWrite2(speedVal_2);
    mySoftPwmWrite3(speedVal_3);
    mySoftPwmWrite4(speedVal_4);
    if (disWarning || turnLeftFlag||turnBackFlag) {
        turn();
    } else {
        printf("Go forward\n");
        go_forward();
    }
}
}
void BEEP_INT (void) {
    digitalWrite(BEEP, HIGH);
}

void BEEP_OPEN (void) {
    digitalWrite(BEEP, HIGH);
    delay(500);
    digitalWrite(BEEP, LOW);
}

// Set up a memory regions to access GPIO
void setup_io()
{
    /* open /dev/mem */
    if ((mem_fd = open("/dev/mem", O_RDWR | O_SYNC)) < 0) {
        printf("can't open /dev/mem \n");
        exit(-1);
    }
    /* mmap GPIO */
    gpio_map = mmap(
        NULL,          //Any address in our space will do
        BLOCK_SIZE,   //Map length
        PROT_READ | PROT_WRITE, // Enable reading & writing to mapped memory
        MAP_SHARED,    //Shared with other processes
        mem_fd,        //File to map
        GPIO_BASE      //Offset to GPIO peripheral
    );

    close(mem_fd); //No need to keep mem_fd open after mmap

    if (gpio_map == MAP_FAILED) {
        printf("mmap error %d\n", (int)gpio_map);//errno also set!
        exit(-1);
    }
    // Always use volatile pointer!
    gpio = (volatile unsigned *)gpio_map;
} // setup_io

uint64_t get_pwm_timestamp()
{
    struct timespec t;

```

```

if (clock_gettime(CLOCK_MONOTONIC_RAW, &t) != 0) {
    return 0;
}
return (uint64_t) t.tv_sec * 1000000 + t.tv_nsec / 1000;
}

void mySoftPwmWrite1( int value)
{
    static int previous_time = 0;
    static int now_time = 0;
    static int time_stamp = 0;
    static unsigned char flag1 = 0;

    if (!flag1) {
        flag1 = 1;
        previous_time = get_pwm_timestamp();
    }
    now_time = get_pwm_timestamp();
    time_stamp = now_time - previous_time;
    if (time_stamp > 0 && time_stamp <= halfPWMPeriod ) { //1/2T
        if (time_stamp <= value) {
            GPIO_SET = 1 << MOTOR_1_PWM;
        }
        else {
            GPIO_CLR = 1 << MOTOR_1_PWM;
        }
    }
    if (time_stamp > halfPWMPeriod && time_stamp <= 2 * halfPWMPeriod ) { //1T
        if (time_stamp <= value) {
            GPIO_SET = 1 << MOTOR_1_PWM;
        }
        else {
            GPIO_CLR = 1 << MOTOR_1_PWM;
        }
    }
    if (time_stamp > 2 * halfPWMPeriod) {
        flag1 = 0;
    }
}

void mySoftPwmWrite2( int value)
{
    static int previous_time = 0;
    static int now_time = 0;
    static int time_stamp = 0;
    static unsigned char flag2 = 0;
    if (!flag2) {
        flag2 = 1;
        previous_time = get_pwm_timestamp();
    }
    now_time = get_pwm_timestamp();
    time_stamp = now_time - previous_time;
    if (time_stamp > 0 && time_stamp <= halfPWMPeriod ) { //1/2T
        if (time_stamp <= value) {
            GPIO_SET = 1 << MOTOR_2_PWM;
        }
        else {
            GPIO_CLR = 1 << MOTOR_2_PWM;
        }
    }
    if (time_stamp > halfPWMPeriod && time_stamp <= 2 * halfPWMPeriod ) { //1T

```

```

if (time_stamp <= value ) {
    GPIO_SET = 1 << MOTOR_2_PWM;
}
else {
    GPIO_CLR = 1 << MOTOR_2_PWM;
}
}
if (time_stamp > 2 * halfPWMPeriod) {
    flag2 = 0;
}
}
void mySoftPwmWrite3( int value)
{
    static int previous_time = 0;
    static int now_time = 0;
    static int time_stamp = 0;
    static unsigned char flag3 = 0;
    if (!flag3) {
        flag3 = 1;
        previous_time = get_pwm_timestamp();
    }
    now_time = get_pwm_timestamp();
    time_stamp = now_time - previous_time;
    if (time_stamp > 0 && time_stamp <= halfPWMPeriod ) { //1/2T
        if (time_stamp <= value ) {
            GPIO_SET = 1 << MOTOR_3_PWM;
        }
        else {
            GPIO_CLR = 1 << MOTOR_3_PWM;
        }
    }
    if (time_stamp > halfPWMPeriod && time_stamp <= 2 * halfPWMPeriod ) { //1T
        if (time_stamp <= value ) {
            GPIO_SET = 1 << MOTOR_3_PWM;
        }
        else {
            GPIO_CLR = 1 << MOTOR_3_PWM;
        }
    }
    if (time_stamp > 2 * halfPWMPeriod) {
        flag3 = 0;
    }
}
void mySoftPwmWrite4( int value)
{
    static int previous_time = 0;
    static int now_time = 0;
    static int time_stamp = 0;
    static unsigned char flag4 = 0;

    if (!flag4) {
        flag4 = 1;
        previous_time = get_pwm_timestamp();
    }
    now_time = get_pwm_timestamp();
    time_stamp = now_time - previous_time;
    if (time_stamp > 0 && time_stamp <= halfPWMPeriod ) { //1/2T
        if (time_stamp <= value ) {
            GPIO_SET = 1 << MOTOR_4_PWM;
        }
    }
}

```

```

else {
    GPIO_CLR = 1 << MOTOR_4_PWM;
}
}
if (time_stamp > halfPWMPeriod && time_stamp <= 2 * halfPWMPeriod ) { //1T
    if (time_stamp <= value ) {
        GPIO_SET = 1 << MOTOR_4_PWM;
    }
    else {
        GPIO_CLR = 1 << MOTOR_4_PWM;
    }
}
if (time_stamp > 2 * halfPWMPeriod) {
    flag4 = 0;
}
}

void servoInit(void)
{
    INP_GPIO(servo_1); // must use INP_GPIO before we can use OUT_GPIO
    OUT_GPIO(servo_1);
    INP_GPIO(servo_2); // must use INP_GPIO before we can use OUT_GPIO
    OUT_GPIO(servo_2);
}

void servoCtrl(int servoNum, int dutyCycle)
{
    int count = 0;
    for(count = 0; count < 3; count++){
        GPIO_SET = 1 << servoNum;
        delayMicroseconds(dutyCycle);
        GPIO_CLR = 1 << servoNum;
        delayMicroseconds(25000 - dutyCycle);
    }
}

void servoAControl( int value)
{
    static int previous_time = 0;
    static int now_time = 0;
    static int time_stamp = 0;
    static unsigned char flag1 = 0;

    if (!flag1) {
        flag1 = 1;
        previous_time = get_pwm_timestamp();
    }
    now_time = get_pwm_timestamp();
    time_stamp = now_time - previous_time;
    if (time_stamp > 0 && time_stamp <= 10000 ) { //1/2T
        if (time_stamp <= value ) {
            GPIO_SET = 1 << servo_1;
        }
        else {
            GPIO_CLR = 1 << servo_1;
        }
    }
    if (time_stamp > 10000 && time_stamp <= 2 * 10000 ) { //1T
        if (time_stamp <= value ) {
            GPIO_SET = 1 << servo_1;
        }
    }
}

```

```

    }
    else {
        GPIO_CLR = 1 << servo_1;
    }
}
if (time_stamp > 2 * 10000) {
    flag1 = 0;
}
}
void GRB_work(unsigned int ledNum, unsigned long colour, int brightness ) {
    int i;
    ledstring.channel[0].brightness = brightness;
    for (i = 0; i < ledNum; i++) {
        ledstring.channel[0].leds[i] = colour;
    }
    ws2811_render(&ledstring) ;
}

void GRB_MultiColour_work(unsigned int ledNum, int brightness ) {
    int i;
    static int colour_index = 0;

    ledstring.channel[0].brightness = brightness;
    for (i = 0; i < ledNum; i++) {
        colour_index = (1 + colour_index) % 7;
        ledstring.channel[0].leds[i] = grb_colour_table[colour_index];
    }
    ws2811_render(&ledstring) ;
}

void irInit() {
    pinMode(IRIN, INPUT);
    pullUpDnControl(IRIN, PUD_UP);
    // to detect falling edge
    wiringPiISR(IRIN, INT_EDGE_FALLING, (void*)getIR);
    done = 0;
}

void myPWMInit() {
    // Switch GPIO 7..11 to output mode
    INP_GPIO(MOTOR_1_PWM); // must use INP_GPIO before we can use OUT_GPIO
    OUT_GPIO(MOTOR_1_PWM);
    INP_GPIO(MOTOR_2_PWM); // must use INP_GPIO before we can use OUT_GPIO
    OUT_GPIO(MOTOR_2_PWM);
    INP_GPIO(MOTOR_3_PWM); // must use INP_GPIO before we can use OUT_GPIO
    OUT_GPIO(MOTOR_3_PWM);
    INP_GPIO(MOTOR_4_PWM); // must use INP_GPIO before we can use OUT_GPIO
    OUT_GPIO(MOTOR_4_PWM);
}

void GRBInit() {
    ws2811_return_t ret;
    matrix = malloc(sizeof(ws2811_led_t) * width * height);
    if ((ret = ws2811_init(&ledstring)) != WS2811_SUCCESS)
    {
        fprintf(stderr, "ws2811_init failed: %s\n", ws2811_get_return_t_str(ret));
    }
}
}

```

```
void exit_IKPEZE_Robot(void)
{
    int pulsenum;
    client_Connected = 0;
    close(sockfd);
    for (pulsenum = 0; pulsenum < 10; pulsenum++) {
        servoCtrl(servo_1, 1300);
        servoCtrl(servo_2, 1300);
    }
    digitalWrite(BEEP, LOW);
    GRB_work(3, 0, 0 );
}

void INThandler(int sig)
{
    char c;
    signal(sig, SIG_IGN);
    printf("You hit Ctrl-C\n"
           "Do you really want to quit? [y/n] ");
    c = getchar();
    if (c == 'y' || c == 'Y') {
        exit_IKPEZE_Robot();
        printf("Bye.\n");
        exit(0);
    }

    else
        signal(SIGINT, INThandler);
    getchar(); // Get new line character
}
```

## Appendix G

### Source Code for Mobile App in Ionic Framework

```
package com.ionicframework.cordova.webview;

import android.app.Activity;
import android.content.SharedPreferences;
import org.apache.cordova.CallbackContext;
import org.apache.cordova.CordovaPlugin;
import org.json.JSONArray;
import org.json.JSONException;

public class IonicWebView extends CordovaPlugin {

    public static final String WEBVIEW_PREFS_NAME = "WebViewSettings";
    public static final String CDV_SERVER_PATH = "serverBasePath";

    public boolean execute(String action, JSONArray args, CallbackContext callbackContext) throws
    JSONException {

        if (action.equals("setServerBasePath")) {

            final String path = args.getString(0);

            cordova.getActivity().runOnUiThread(new Runnable() {

                public void run() {

                    ((IonicWebViewEngine)webView.getEngine()).setServerBasePath(path);

                }

            });

            return true;

        } else if (action.equals("getServerBasePath")) {

            callbackContext.success(((IonicWebViewEngine)webView.getEngine()).getServerBasePath());

            return true;

        } else if (action.equals("persistServerBasePath")) {

            String path = ((IonicWebViewEngine)webView.getEngine()).getServerBasePath();

            SharedPreferences prefs =
            cordova.getActivity().getApplicationContext().getSharedPreferences(WEBVIEW_PREFS_NAME,
            Activity.MODE_PRIVATE);

            SharedPreferences.Editor editor = prefs.edit();

            editor.putString(CDV_SERVER_PATH, path);

        }

    }

}
```



```
        editor.apply();

        return true;
    }

    return false;

package com.ionicframework.cordova.webview;

import android.app.Activity;
import android.content.Context;
import android.content.SharedPreferences;
import android.content.pm.PackageInfo;
import android.annotation.TargetApi;
import android.graphics.Bitmap;
import android.net.Uri;
import android.os.Build;
import android.support.annotation.RequiresApi;
import android.util.Log;
import android.webkit.WebResourceRequest;
import android.webkit.WebResourceResponse;
import android.webkit.WebSettings;
import android.webkit.WebView;
import org.apache.cordova.ConfigXmlParser;
import org.apache.cordova.CordovaInterface;
import org.apache.cordova.CordovaPreferences;
import org.apache.cordova.CordovaResourceApi;
import org.apache.cordova.CordovaWebView;
import org.apache.cordova.CordovaWebViewEngine;
import org.apache.cordova.NativeToJsMessageQueue;
import org.apache.cordova.PluginManager;
import org.apache.cordova.engine.SystemWebViewClient;
import org.apache.cordova.engine.SystemWebViewEngine;
import org.apache.cordova.engine.SystemWebView;

public class IonicWebViewEngine extends SystemWebViewEngine {
    public static final String TAG = "IonicWebViewEngine";
```

```

private WebViewLocalServer localServer;

private String CDV_LOCAL_SERVER;

private String scheme;

private static final String LAST_BINARY_VERSION_CODE = "lastBinaryVersionCode";
private static final String LAST_BINARY_VERSION_NAME = "lastBinaryVersionName";

/**
 * Used when created via reflection.
 */

public IonicWebViewEngine(Context context, CordovaPreferences preferences) {
    super(new SystemWebView(context), preferences);

    Log.d(TAG, "Ionic Web View Engine Starting Right Up 1...");
}

public IonicWebViewEngine(SystemWebView webView) {
    super(webView, null);

    Log.d(TAG, "Ionic Web View Engine Starting Right Up 2...");
}

public IonicWebViewEngine(SystemWebView webView, CordovaPreferences preferences) {
    super(webView, preferences);

    Log.d(TAG, "Ionic Web View Engine Starting Right Up 3...");
}

@Override

public void init(CordovaWebView parentWebView, CordovaInterface cordova, final
CordovaWebViewEngine.Client client,

                CordovaResourceApi resourceApi, PluginManager pluginManager,

                NativeToJsMessageQueue nativeToJsMessageQueue) {

    ConfigXmlParser parser = new ConfigXmlParser();
    parser.parse(cordova.getActivity());

    String hostname = preferences.getString("Hostname", "localhost");

    scheme = preferences.getString("Scheme", "http");

    CDV_LOCAL_SERVER = scheme + "://" + hostname;

    localServer = new WebViewLocalServer(cordova.getActivity(), hostname, true, parser, scheme);

    localServer.hostAssets("www");

    webView.setWebViewClient(new ServerClient(this, parser));

```

```

super.init(parentWebView, cordova, client, resourceApi, pluginManager, nativeToJsMessageQueue);

if (android.os.Build.VERSION.SDK_INT >= Build.VERSION_CODES.LOLLIPOP) {

    final WebSettings settings = webView.getSettings();

    int mode = preferences.getInteger("MixedContentMode", 0);

    settings.setMixedContentMode(mode);

}

SharedPreferences prefs =
cordova.getActivity().getApplicationContext().getSharedPreferences(IonicWebView.WEBVIEW_PREFS_NAME, Activity.MODE_PRIVATE);

String path = prefs.getString(IonicWebView.CDV_SERVER_PATH, null);

if (!isDeployDisabled() && !isNewBinary() && path != null && !path.isEmpty()) {

    setServerBasePath(path);

}

}

private boolean isNewBinary() {

    String versionCode = "";

    String versionName = "";

    SharedPreferences prefs =
cordova.getActivity().getApplicationContext().getSharedPreferences(IonicWebView.WEBVIEW_PREFS_NAME, Activity.MODE_PRIVATE);

    String lastVersionCode = prefs.getString(LAST_BINARY_VERSION_CODE, null);

    String lastVersionName = prefs.getString(LAST_BINARY_VERSION_NAME, null);

    try {

        PackageInfo pInfo =
this.cordova.getActivity().getPackageManager().getPackageInfo(this.cordova.getActivity().getPackageName(), 0);

        versionCode = Integer.toString(pInfo.versionCode);

        versionName = pInfo.versionName;

    } catch (Exception ex) {

        Log.e(TAG, "Unable to get package info", ex);

    }

    if (!versionCode.equals(lastVersionCode) || !versionName.equals(lastVersionName)) {

        SharedPreferences.Editor editor = prefs.edit();

        editor.putString(LAST_BINARY_VERSION_CODE, versionCode);

```

```

    editor.putString(LAST_BINARY_VERSION_NAME, versionName);

    editor.putString(IonicWebView.CDV_SERVER_PATH, "");

    editor.apply();

    return true;
}

return false;
}

private boolean isDeployDisabled() {
    return preferences.getBoolean("DisableDeploy", false);
}

private class ServerClient extends SystemWebViewClient {
    private ConfigXmlParser parser;

    public ServerClient(SystemWebViewEngine parentEngine, ConfigXmlParser parser) {
        super(parentEngine);

        this.parser = parser;
    }

    @RequiresApi(Build.VERSION_CODES.LOLLIPOP)
    @Override
    public WebResourceResponse shouldInterceptRequest(WebView view, WebResourceRequest
request) {
        return localServer.shouldInterceptRequest(request.getUrl(), request);
    }

    @TargetApi(Build.VERSION_CODES.KITKAT)
    @Override
    public WebResourceResponse shouldInterceptRequest(WebView view, String url) {
        return localServer.shouldInterceptRequest(Uri.parse(url), null);
    }

    @Override
    public void onPageStarted(WebView view, String url, Bitmap favicon) {
        super.onPageStarted(view, url, favicon);

        String launchUrl = parser.getLaunchUrl();

```

```

        if (!launchUrl.contains(WebViewLocalServer.httpsScheme) &&
!launchUrl.contains(WebViewLocalServer.httpScheme) && url.equals(launchUrl)) {

            view.stopLoading();

            // When using a custom scheme the app won't load if server start url doesn't end in /

            String startUrl = CDV_LOCAL_SERVER;

            if (!scheme.equalsIgnoreCase(WebViewLocalServer.httpsScheme) &&
!scheme.equalsIgnoreCase(WebViewLocalServer.httpScheme)) {

                startUrl += "/";

            }

            view.loadUrl(startUrl);

        }

    }

    @Override

    public void onPageFinished(WebView view, String url) {

        super.onPageFinished(view, url);

        view.loadUrl("javascript:(function() { " +

            "window.WEBVIEW_SERVER_URL = " + CDV_LOCAL_SERVER + ";" +

            "})();");

    }

}

public void setServerBasePath(String path) {

    localServer.hostFiles(path);

    webView.loadUrl(CDV_LOCAL_SERVER);

}

public String getServerBasePath() {

    return this.localServer.getBasePath();

}

}

```

## Appendix H

### Source Code for Android Protocol Handler

```
package com.ionicframework.cordova.webview;

import android.content.Context;
import android.content.res.AssetManager;
import android.net.Uri;
import android.util.Log;
import android.util.TypedValue;
import java.io.File;
import java.io.FileInputStream;
import java.io.IOException;
import java.io.InputStream;
import java.util.List;

public class AndroidProtocolHandler {
    private static final String TAG = "AndroidProtocolHandler";

    private Context context;

    public AndroidProtocolHandler(Context context) {
        this.context = context;
    }

    public InputStream openAsset(String path) throws IOException {
        return context.getAssets().open(path, AssetManager.ACCESS_STREAMING);
    }

    public InputStream openResource(Uri uri) {
        assert uri.getPath() != null;

        // The path must be of the form ".../asset_type/asset_name.ext".
        List<String> pathSegments = uri.getPathSegments();
        String assetType = pathSegments.get(pathSegments.size() - 2);
        String assetName = pathSegments.get(pathSegments.size() - 1);
    }
}
```

```

// Drop the file extension.
assetName = assetName.split("\\.")[0];
try {
    // Use the application context for resolving the resource package name so that we do
    // not use the browser's own resources. Note that if 'context' here belongs to the
    // test suite, it does not have a separate application context. In that case we use
    // the original context object directly.
    if (context.getApplicationContext() != null) {
        context = context.getApplicationContext();
    }
    int fieldId = getFieldId(context, assetType, assetName);
    int valueType = getValueType(context, fieldId);
    if (valueType == TypedValue.TYPE_STRING) {
        return context.getResources().openRawResource(fieldId);
    } else {
        Log.e(TAG, "Asset not of type string: " + uri);
        return null;
    }
} catch (ClassNotFoundException e) {
    Log.e(TAG, "Unable to open resource URL: " + uri, e);
    return null;
} catch (NoSuchFieldException e) {
    Log.e(TAG, "Unable to open resource URL: " + uri, e);
    return null;
} catch (IllegalAccessException e) {
    Log.e(TAG, "Unable to open resource URL: " + uri, e);
    return null;
}
}

public InputStream openFile(String filePath) throws IOException {
    String realPath = filePath.replace(WebViewLocalServer.fileStart, "");
    File localFile = new File(realPath);
    return new FileInputStream(localFile);
}

```

```

}

public InputStream openContentUrl(Uri uri) throws IOException {

    Integer port = uri.getPort();

    String realPath;

    if (port == -1) {

        realPath = uri.toString().replace(uri.getScheme() + "://" + uri.getHost() +
WebViewLocalServer.contentStart, "content:");

    } else {

        realPath = uri.toString().replace(uri.getScheme() + "://" + uri.getHost() + ":" + port +
WebViewLocalServer.contentStart, "content:");

    }

    InputStream stream = null;

    try {

        stream = context.getContentResolver().openInputStream(Uri.parse(realPath));

    } catch (SecurityException e) {

        Log.e(TAG, "Unable to open content URL: " + uri, e);

    }

    return stream;

}

private static int getFieldId(Context context, String assetType, String assetName)

throws ClassNotFoundException, NoSuchFieldException, IllegalAccessException {

    Class<?> d = context.getClassLoader()

        .loadClass(context.getPackageName() + ".R$" + assetType);

    java.lang.reflect.Field field = d.getField(assetName);

    int id = field.getInt(null);

    return id;

}

private static int getValueType(Context context, int fieldId) {

    TypedValue value = new TypedValue();

    context.getResources().getValue(fieldId, value, true);

    return value.type;

}

}

```



## Appendix I

### Source Code for Web Server on Raspberry Pi (Uctronics, 2018)

```
package com.ionicframework.cordova.webview;

import android.content.Context;

import android.net.Uri;

import android.os.Build;

import android.util.Log;

import android.webkit.WebResourceRequest;

import android.webkit.WebResourceResponse;

import org.apache.cordova.ConfigXmlParser;

import java.io.IOException;

import java.io.InputStream;

import java.net.HttpURLConnection;

import java.net.SocketTimeoutException;

import java.net.URL;

import java.net.URLConnection;

import java.util.HashMap;

import java.util.Map;

import java.util.UUID;

/**

 * Helper class meant to be used with the android.webkit.WebView class to enable hosting assets,

 * resources and other data on 'virtual' http(s):// URL.

 * Hosting assets and resources on http(s):// URLs is desirable as it is compatible with the

 * Same-Origin policy.

 * <p>

 * This class is intended to be used from within the

 * {@link android.webkit.WebViewClient#shouldInterceptRequest(android.webkit.WebView, String)}

 and

 * {@link android.webkit.WebViewClient#shouldInterceptRequest(android.webkit.WebView,

 * android.webkit.WebResourceRequest)}

 * methods.

 */
```

```

public class WebViewLocalServer {

    private static String TAG = "WebViewAssetServer";

    private String basePath;

    public final static String httpScheme = "http";

    public final static String httpsScheme = "https";

    public final static String fileStart = "/_app_file_";

    public final static String contentStart = "/_app_content_";

    private final UriMatcher uriMatcher;

    private final AndroidProtocolHandler protocolHandler;

    private final String authority;

    private final String customScheme;

    // Whether we're serving local files or proxying (for example, when doing livereload on a
    // non-local endpoint (will be false in that case)
    private boolean isAsset;

    // Whether to route all requests to paths without extensions back to `index.html`
    private final boolean html5mode;

    private ConfigXmlParser parser;

    public String getAuthority() { return authority; }

    /**
     * A handler that produces responses for paths on the virtual asset server.
     *
     * <p>
     * Methods for this handler will be invoked on a background thread and care must be taken to
     * correctly synchronize access to any shared state.
     *
     * <p>
     * On Android KitKat and above these methods may be called on more than one thread. This thread
     * may be different than the thread on which the shouldInterceptRequest method was invoke.
     * This means that on Android KitKat and above it is possible to block in this method without
     * blocking other resources from loading. The number of threads used to parallelize loading
     * is an internal implementation detail of the WebView and may change between updates which
     * means that the amount of time spend blocking in this method should be kept to an absolute
     * minimum.
     */

    public abstract static class PathHandler {

```

```
protected String mimeType;

private String encoding;

private String charset;

private int statusCode;

private String reasonPhrase;

private Map<String, String> responseHeaders;

public PathHandler() {
    this(null, null, 200, "OK", null);
}

public PathHandler(String encoding, String charset, int statusCode,
    String reasonPhrase, Map<String, String> responseHeaders) {
    this.encoding = encoding;
    this.charset = charset;
    this.statusCode = statusCode;
    this.reasonPhrase = reasonPhrase;
    Map<String, String> tempResponseHeaders;
    if (responseHeaders == null) {
        tempResponseHeaders = new HashMap<String, String>();
    } else {
        tempResponseHeaders = responseHeaders;
    }
    tempResponseHeaders.put("Cache-Control", "no-cache");
    this.responseHeaders = tempResponseHeaders;
}

abstract public InputStream handle(Uri url);

public String getEncoding() {
    return encoding;
}

public String getCharset() {
    return charset;
}

public int getStatusCode() {
    return statusCode;
}
```

```

    }

    public String getReasonPhrase() {
        return reasonPhrase;
    }

    public Map<String, String> getResponseHeaders() {
        return responseHeaders;
    }
}

/**
 * Information about the URLs used to host the assets in the WebView.
 */

public static class AssetHostingDetails {
    private Uri httpPrefix;
    private Uri httpsPrefix;

    /**package*/ AssetHostingDetails(Uri httpPrefix, Uri httpsPrefix) {
        this.httpPrefix = httpPrefix;
        this.httpsPrefix = httpsPrefix;
    }

    /**
     * Gets the http: scheme prefix at which assets are hosted.
     *
     * @return the http: scheme prefix at which assets are hosted. Can return null.
     */

    public Uri getHttpPrefix() {
        return httpPrefix;
    }

    /**
     * Gets the https: scheme prefix at which assets are hosted.
     *
     * @return the https: scheme prefix at which assets are hosted. Can return null.
     */

    public Uri getHttpsPrefix() {
        return httpsPrefix;
    }
}

```

```

    }
}

WebViewLocalServer(Context context, String authority, boolean html5mode, ConfigXmlParser
parser, String customScheme) {
    uriMatcher = new UriMatcher(null);

    this.html5mode = html5mode;

    this.parser = parser;

    this.protocolHandler = new AndroidProtocolHandler(context.getApplicationContext());

    this.authority = authority;

    this.customScheme = customScheme;
}

private static Uri parseAndVerifyUrl(String url) {
    if (url == null) {
        return null;
    }

    Uri uri = Uri.parse(url);

    if (uri == null) {
        Log.e(TAG, "Malformed URL: " + url);

        return null;
    }

    String path = uri.getPath();

    if (path == null || path.length() == 0) {
        Log.e(TAG, "URL does not have a path: " + url);

        return null;
    }

    return uri;
}

private static WebResourceResponse createWebResourceResponse(String mimeType, String
encoding, int statusCode, String reasonPhrase, Map<String, String> responseHeaders, InputStream
data) {
    if (android.os.Build.VERSION.SDK_INT >= Build.VERSION_CODES.LOLLIPOP) {

        int finalStatusCode = statusCode;

        try {

            if (data.available() == 0) {

```

```

        finalStatusCode = 404;
    }
} catch (IOException e) {
    finalStatusCode = 500;
}

return new WebResourceResponse(mimeType, encoding, finalStatusCode, reasonPhrase,
responseHeaders, data);
} else {
    return new WebResourceResponse(mimeType, encoding, data);
}
}
}
/**
 * Attempt to retrieve the WebResourceResponse associated with the given <code>request</code>.
 * This method should be invoked from within
 * { @link android.webkit.WebViewClient#shouldInterceptRequest(android.webkit.WebView,
 * android.webkit.WebResourceRequest)}.
 *
 * @param uri the request Uri to process.
 * @return a response if the request URL had a matching handler, null if no handler was found.
 */
public WebResourceResponse shouldInterceptRequest(Uri uri, WebResourceRequest request) {
    PathHandler handler;
    synchronized (uriMatcher) {
        handler = (PathHandler) uriMatcher.match(uri);
    }
    if (handler == null) {
        return null;
    }
    if (isLocalFile(uri) || uri.getAuthority().equals(this.authority)) {
        Log.d("SERVER", "Handling local request: " + uri.toString());
        return handleLocalRequest(uri, handler, request);
    } else {
        return handleProxyRequest(uri, handler);
    }
}

```

```

    }
}

private boolean isLocalFile(Uri uri) {
    String path = uri.getPath();
    if (path.startsWith(contentStart) || path.startsWith(fileStart)) {
        return true;
    }
    return false;
}

private WebResourceResponse handleLocalRequest(Uri uri, PathHandler handler,
WebResourceRequest request) {
    String path = uri.getPath();

    if (Build.VERSION.SDK_INT >= Build.VERSION_CODES.LOLLIPOP && request != null &&
request.getRequestHeaders().get("Range") != null) {
        InputStream responseStream = new LollipopLazyInputStream(handler, uri);
        String mimeType = getMimeType(path, responseStream);
        Map<String, String> tempResponseHeaders = handler.getResponseHeaders();
        int statusCode = 206;
        try {
            int totalRange = responseStream.available();
            String rangeString = request.getRequestHeaders().get("Range");
            String[] parts = rangeString.split("=");
            String[] streamParts = parts[1].split("-");
            String fromRange = streamParts[0];
            int range = totalRange-1;
            if (streamParts.length > 1) {
                range = Integer.parseInt(streamParts[1]);
            }
            tempResponseHeaders.put("Accept-Ranges", "bytes");
            tempResponseHeaders.put("Content-Range", "bytes " + fromRange + "-" + range + "/" +
totalRange);
        } catch (IOException e) {
            statusCode = 404;
        }
    }
}

```

```

return createWebResourceResponse(mimeType, handler.getEncoding(),
    statusCode, handler.getReasonPhrase(), tempResponseHeaders, responseStream);
}
if (isLocalFile(uri)) {
    InputStream responseStream = new LollipopLazyInputStream(handler, uri);
    String mimeType = getMimeType(path, responseStream);
    return createWebResourceResponse(mimeType, handler.getEncoding(),
        handler.getStatusCode(), handler.getReasonPhrase(), handler.getResponseHeaders(),
        responseStream);
}
if (path.equals("/") || path.equals("/") || (!uri.getLastPathSegment().contains(".") && html5mode)) {
    InputStream stream;
    String launchURL = parser.getLaunchUrl();
    String launchFile = launchURL.substring(launchURL.lastIndexOf("/") + 1, launchURL.length());
    try {
        String startPath = this.basePath + "/" + launchFile;
        if (isAsset) {
            stream = protocolHandler.openAsset(startPath);
        } else {
            stream = protocolHandler.openFile(startPath);
        }
    } catch (IOException e) {
        Log.e(TAG, "Unable to open " + launchFile, e);
        return null;
        return createWebResourceResponse("text/html", handler.getEncoding(),
            handler.getStatusCode(), handler.getReasonPhrase(), handler.getResponseHeaders(), stream);
    }
}
int periodIndex = path.lastIndexOf(".");
if (periodIndex >= 0) {
    InputStream responseStream = new LollipopLazyInputStream(handler, uri);
    String mimeType = getMimeType(path, responseStream);
    return createWebResourceResponse(mimeType, handler.getEncoding(),

```



```

        handler.getStatusCode(), handler.getReasonPhrase(), handler.getResponseHeaders(),
        responseStream);
    }
    return null;
}
/**
 * Instead of reading files from the filesystem/assets, proxy through to the URL
 * and let an external server handle it.
 * @param uri
 * @param handler
 * @return
 */
private WebResourceResponse handleProxyRequest(Uri uri, PathHandler handler) {
    try {
        String path = uri.getPath();
        URL url = new URL(uri.toString());
        HttpURLConnection conn = (HttpURLConnection) url.openConnection();
        conn.setRequestMethod("GET");
        conn.setReadTimeout(30 * 1000);
        conn.setConnectTimeout(30 * 1000);
        InputStream stream = conn.getInputStream();
        if (path.equals("/") || (!uri.getLastPathSegment().contains(".") && html5mode)) {
            return createWebResourceResponse("text/html", handler.getEncoding(),
                handler.getStatusCode(), handler.getReasonPhrase(), handler.getResponseHeaders(),
                stream);
        }
        int periodIndex = path.lastIndexOf(".");
        if (periodIndex >= 0) {
            String ext = path.substring(path.lastIndexOf("."), path.length());
            // TODO: Conjure up a bit more subtlety than this
            if (ext.equals(".html")) {
            }
            String mimeType = getMimeType(path, stream);

```

```

return createWebResponse(mimeType, handler.getEncoding(),
    handler.getStatusCode(), handler.getReasonPhrase(), handler.getResponseHeaders(), stream);
}
return createWebResponse("", handler.getEncoding(),
    handler.getStatusCode(), handler.getReasonPhrase(), handler.getResponseHeaders(), stream);
} catch (SocketTimeoutException ex) {
    // bridge.handleAppUrlLoadError(ex);
} catch (Exception ex) {
    // bridge.handleAppUrlLoadError(ex);
}
return null;
}

private String getMimeType(String path, InputStream stream) {
    String mimeType = null;
    try {
        mimeType = URLConnection.guessContentTypeFromName(path); // Does not recognize *.js
        if (mimeType != null && path.endsWith(".js") && mimeType.equals("image/x-icon")) {
            Log.d(IonicWebViewEngine.TAG, "We shouldn't be here");
        }
        if (mimeType == null) {
            if (path.endsWith(".js") || path.endsWith(".mjs")) {
                // Make sure JS files get the proper mimetype to support ES modules
                mimeType = "application/javascript";
            } else if (path.endsWith(".wasm")) {
                mimeType = "application/wasm";
            } else {
                mimeType = URLConnection.guessContentTypeFromStream(stream);
            }
        }
    } catch (Exception ex) {
        Log.e(TAG, "Unable to get mime type" + path, ex);
    }
    return mimeType;
}

```

```

}
/**
 * Registers a handler for the given <code>uri</code>. The <code>handler</code> will be invoked
 * every time the <code>shouldInterceptRequest</code> method of the instance is called with
 * a matching <code>uri</code>.
 *
 * @param uri the uri to use the handler for. The scheme and authority (domain) will be matched
 * exactly. The path may contain a '*' element which will match a single element of
 * a path (so a handler registered for /a/* will be invoked for /a/b and /a/c.html
 * but not for /a/b/b) or the '**' element which will match any number of path
 * elements.
 * @param handler the handler to use for the uri.
 */
void register(Uri uri, PathHandler handler) {
    synchronized (uriMatcher) {
        uriMatcher.addURI(uri.getScheme(), uri.getAuthority(), uri.getPath(), handler);
    }
}
/**
 * Hosts the application's assets on an http(s):// URL. Assets from the local path
 * <code>assetPath/...</code> will be available under
 * <code>http(s)://{uuid}.androidplatform.net/assets/...</code>.
 *
 * @param assetPath the local path in the application's asset folder which will be made
 * available by the server (for example "/www").
 */
public void hostAssets(String assetPath) {
    hostAssets(authority, assetPath);
}
/**
 * Hosts the application's assets on an http(s):// URL. Assets from the local path
 * <code>assetPath/...</code> will be available under
 * <code>http(s)://{domain}/{virtualAssetPath}/...</code>.

```

```

*
* @param domain      custom domain on which the assets should be hosted (for example
"example.com").
* @param assetPath   the local path in the application's asset folder which will be made
*
*                   available by the server (for example "/www").
* @return prefixes under which the assets are hosted.
*/
public void hostAssets(final String domain,
                      final String assetPath) {
    this.isAsset = true;
    this.basePath = assetPath;
    createHostingDetails();
}
private void createHostingDetails() {
    final String assetPath = this.basePath;
    if (assetPath.indexOf('*') != -1) {
        throw new IllegalArgumentException("assetPath cannot contain the '*' character.");
    }
    PathHandler handler = new PathHandler() {
        @Override
        public InputStream handle(Uri url) {
            InputStream stream = null;
            String path = url.getPath();
            try {
                if (path.startsWith(contentStart)) {
                    stream = protocolHandler.openContentUrl(url);
                } else if (path.startsWith(fileStart) || !isAsset) {
                    if (!path.startsWith(fileStart)) {
                        path = basePath + url.getPath();
                    }
                    stream = protocolHandler.openFile(path);
                } else {
                    stream = protocolHandler.openAsset(assetPath + path);
                }
            }
        }
    };
}

```

```
    }  
    } catch (IOException e) {  
        Log.e(TAG, "Unable to open asset URL: " + url);  
        return null;  
    }  
    return stream;  
}  
};  
registerUriForScheme(httpScheme, handler, authority);  
registerUriForScheme(httpsScheme, handler, authority);  
if (!customScheme.equals(httpScheme) && !customScheme.equals(httpsScheme)) {  
    registerUriForScheme(customScheme, handler, authority);  
}  
}  
private void registerUriForScheme(String scheme, PathHandler handler, String authority) {  
    Uri.Builder uriBuilder = new Uri.Builder();  
    uriBuilder.scheme(scheme);  
    uriBuilder.authority(authority);  
    uriBuilder.path("");  
    Uri uriPrefix = uriBuilder.build();  
    register(Uri.withAppendedPath(uriPrefix, "/"), handler);  
    register(Uri.withAppendedPath(uriPrefix, "**"), handler);  
}
```
